# Supplementary material for: Diet-Related Risk Factors for Incident Hypertension During an 11-Year Follow-Up: The Korean Genome Epidemiology Study
Source: MDPI journal article supplement (doi:10.3390/nu10081077), 2018-08-13
Supplement: s1 [file s1]

Supplemental table S1. Composition of the 20 food groups

| Food group     | Food items                                                                                                                                                                                                                                                                                                                               |
|----------------|------------------------------------------------------------------------------------------------------------------------------------------------------------------------------------------------------------------------------------------------------------------------------------------------------------------------------------------|
| Rice           | Cooked well-milled rice, cooked rice with barley, cooked rice with other cereals, parched cereal powder, rice cakes (plain rod shape), other rice cakes, cereals                                                                                                                                                                         |
| Noodles        | Ramen, noodles with soup, chajangmyon, buckwheat vermicelli/buckwheat noodle, dumpling                                                                                                                                                                                                                                                   |
| Bread          | Loaf bread, bread with small red beans, other breads, pizza/fast food, cakes                                                                                                                                                                                                                                                             |
| Sugar          | Snacks, candy/chocolate, coffee sugar, coffee cream                                                                                                                                                                                                                                                                                      |
| Oil and fat    | Butter/margarine                                                                                                                                                                                                                                                                                                                         |
| Potatoes       | Potatoes, sweet potatoes, starch vermicelli, starch jelly                                                                                                                                                                                                                                                                                |
| Soybean        | Soybean, tofu, stew with soybean pastes, soybean milk                                                                                                                                                                                                                                                                                    |
| Nuts and seeds | Nuts                                                                                                                                                                                                                                                                                                                                     |
| Kimchi         | Kimchi, Korean cabbage, kakduki/small radish kimchi, kimchi with liquid, other kimchi (green onion/kodulbbagi/mustard leaves), pickles                                                                                                                                                                                                   |
| Vegetables     | Green pepper, red pepper leaves, spinach, lettuce, perilla leaf, leek/water dropwort, green-yellow vegetables, radish/salted radish, doraji/deoduck (kinds of white root), onion, cabbages, cucumber, bean sprouts, carrot, pumpkin gruel/pumpkin juice, young pumpkin, vegetable juice, bracken/sweet potato stalk, tomato/tomato juice |
| Mushrooms      | Oyster mushroom, other mushrooms                                                                                                                                                                                                                                                                                                         |
| Fruit          | Persimmon, dried persimmon, tangerine, muskmelon/melon, banana, pear, apple/apple juice, orange/orange juice, watermelon, peach/plum, strawberry, grape/grape juice                                                                                                                                                                      |
| Meat           | Pan-roast pork, pork belly, braised pork, pan-roast beef ribs, thick beef soup/hard-boiled beef ribs, chicken/chicken leg/chicken wing, ham/sausage, dog meat, edible viscera                                                                                                                                                            |
| Eggs           | Eggs                                                                                                                                                                                                                                                                                                                                     |
| Fish           | Sushi, hair tail, eel, yellow croaker, Alaska pollack, mackerel/Pacific saury/Spanish mackerel, dried anchovy                                                                                                                                                                                                                            |
| Shellfish      | Cuttlefish/octopus, tuna, canned, fish paste/crab flavored, crab, clam (small ark shell/little neck clam/clam meat), oyster, shrimp                                                                                                                                                                                                      |
| Salted seafood | Salt-fermented seafood (fish, shrimp, etc.)                                                                                                                                                                                                                                                                                              |
| Seaweeds       | Laver, kelp/sea mustard                                                                                                                                                                                                                                                                                                                  |
| Dairy products | Milk, yoghurt, ice cream, cheese                                                                                                                                                                                                                                                                                                         |
| Drinks         | Carbonated drinks, coffee, green tea, sikhae, citron tea                                                                                                                                                                                                                                                                                 |

Supplemental table S2. Criteria for subgrouping of daily intake (g/day) of the 20 food groups†

| Food group     | Q1      | Q2              | Q3              | Q4              | Q5      |
|----------------|---------|-----------------|-----------------|-----------------|---------|
| Rice           | < 547.7 | 547.7 ≤ < 647.9 | 647.9 ≤ < 712.7 | 712.7 ≤ < 778.2 | ≥ 778.2 |
| Noodles        | < 29.8  | 29.8 ≤ < 51.7   | 51.7 ≤ < 75.9   | 75.9 ≤ < 112.8  | ≥ 112.8 |
| Bread          | < 1.8   | 1.8 ≤ < 7.4     | 7.4 ≤ < 12.4    | 12.4 ≤ < 23.4   | ≥ 23.4  |
| Sugar          | < 3.6   | 3.6 ≤ < 7.7     | 7.7 ≤ < 13.3    | 13.3 ≤ < 23.2   | ≥ 23.2  |
| Oil and fat    | 0       | 0 < < 0.003     | 0.003 ≤ < 0.02  | 0.02 ≤ < 0.04   | ≥ 0.04  |
| Potatoes       | < 6.8   | 6.8 ≤ < 13.0    | 13.0 ≤ < 20.2   | 20.2 ≤ < 33.7   | ≥ 33.7  |
| Soybean        | < 16.2  | 16.2 ≤ < 26.1   | 26.1 ≤ < 37.7   | 37.7 ≤ < 58.6   | ≥ 58.6  |
| Nuts and seeds | 0       | 0 < < 0.2       | 0.2 ≤ < 0.4     | 0.4 ≤ < 0.8     | ≥ 0.8   |
| Kimchi         | < 98.3  | 98.3 ≤ < 152.1  | 152.1 ≤ < 199.3 | 199.3 ≤ < 289.7 | ≥ 289.7 |
| Vegetables     | < 65.8  | 65.8 ≤ < 93.5   | 93.5 ≤ < 122.8  | 122.8 ≤ < 172.3 | ≥ 172.3 |
| Mushrooms      | < 1.4   | 1.4 ≤ < 3.3     | 3.3 ≤ < 6.3     | 6.3 ≤ < 12.9    | ≥ 12.9  |
| Fruit          | < 97.1  | 97.1 ≤ < 172.2  | 172.2 ≤ < 247.8 | 247.8 ≤ < 383.1 | ≥ 383.1 |
| Meat           | < 26.3  | 26.3 ≤ < 41.7   | 41.7 ≤ < 58.3   | 58.3 ≤ < 83.7   | ≥ 83.7  |
| Eggs           | < 2.6   | 2.6 ≤ < 6.2     | 6.2 ≤ < 11.0    | 11.0 ≤ < 21.3   | ≥ 21.3  |
| Fish           | < 11.4  | 11.4 ≤ < 18.4   | 18.4 ≤ < 26.1   | 26.1 ≤ < 40.5   | ≥ 40.5  |
| Shellfish      | < 3.7   | 3.7 ≤ < 7.3     | 7.3 ≤ < 11.6    | 11.6 ≤ < 18.8   | ≥ 18.8  |
| Salted seafood | 0       | 0 < < 0.5       | 0.5 ≤ < 1.0     | 1.0 ≤ < 2.6     | ≥ 2.6   |
| Seaweeds       | < 0.7   | 0.7 ≤ < 1.2     | 1.2 ≤ < 1.8     | 1.8 ≤ < 2.8     | ≥ 2.8   |
| Dairy products | < 21.9  | 21.9 ≤ < 51.5   | 51.5 ≤ < 103.4  | 103.4 ≤ < 202.8 | ≥ 202.8 |
| Drinks         | < 17.8  | 17.8 ≤ < 36.4   | 36.4 ≤ < 62.4   | 62.4 ≤ < 125.3  | ≥ 125.3 |

Q; Quintiles

† The average daily consumption was estimated after controlling for total energy using the residual method.

Supplemental table S3. Average daily intakes (g) of the 20 food groups†

| Food group<br>(g/day) | Total  |       | Without incident HTN |       | With incident HTN |       |
|-----------------------|--------|-------|----------------------|-------|-------------------|-------|
|                       | Mean   | S.D   | Mean                 | S.D   | Mean              | S.D   |
| Rice                  | 674.4  | 183.1 | 669.9                | 180.2 | 695.0             | 194.8 |
| Noodles               | 76.7   | 76.6  | 76.7                 | 73.5  | 76.4              | 89.3  |
| Bread                 | 15.4   | 25.2  | 15.8                 | 25.7  | 13.4              | 22.3  |
| Sugar                 | 14.1   | 15.4  | 14.3                 | 15.5  | 13.5              | 14.8  |
| Oil and fat           | 0.1    | 0.4   | 0.1                  | 0.4   | 0.1               | 0.4   |
| Potatoes              | 22.9   | 27.9  | 23.0                 | 28.2  | 22.3              | 26.4  |
| Soybean               | 41.4   | 43.6  | 41.6                 | 44.0  | 40.8              | 41.8  |
| Nuts and seeds        | 0.8    | 2.5   | 0.8                  | 2.6   | 0.7               | 2.2   |
| Kimchi                | 202.9  | 139.6 | 202.7                | 139.3 | 203.8             | 141.1 |
| Vegetables            | 128.0  | 109.1 | 128.2                | 110.4 | 127.0             | 103.3 |
| Mushrooms             | 7.9    | 11.5  | 8.0                  | 11.6  | 7.5               | 10.9  |
| Fruit                 | 266.1  | 279.3 | 266.8                | 280.1 | 263.2             | 275.7 |
| Meat                  | 57.1   | 48.2  | 58.2                 | 48.2  | 51.7              | 48.0  |
| Eggs                  | 12.5   | 15.2  | 12.7                 | 15.4  | 11.6              | 14.4  |
| Fish                  | 27.5   | 28.2  | 27.6                 | 28.8  | 27.0              | 25.8  |
| Shellfish             | 12.4   | 15.4  | 12.5                 | 15.4  | 12.0              | 15.5  |
| Salted seafood        | 2.0    | 4.8   | 1.9                  | 4.7   | 2.2               | 5.2   |
| Seaweeds              | 1.9    | 1.9   | 1.9                  | 1.9   | 1.8               | 1.8   |
| Dairy products        | 110.5  | 127.3 | 112.0                | 128.2 | 103.4             | 122.8 |
| Drinks                | 77.4   | 102.2 | 77.6                 | 103.1 | 76.2              | 98.0  |
| Total energy (kcal)   | 1952.8 | 620.0 | 1951.2               | 617.7 | 1960.4            | 630.4 |
| Carbohydrate (%)      | 70.9   | 6.9   | 70.7                 | 7.0   | 71.6              | 6.6   |
| Protein (%)           | 13.5   | 2.4   | 13.5                 | 2.4   | 13.4              | 2.3   |
| Fat (%)               | 14.6   | 5.3   | 14.7                 | 5.4   | 13.9              | 5.2   |

SD, standard deviation, HTN, hypertension

†The average daily consumption was estimated after controlling for total energy using the residual method.
